# Supplementary material for: Effect of Short-Term Stimulation with Interleukin-1β and Differentiation Medium on Human Mesenchymal Stromal Cell Paracrine Activity in Coculture with Osteoblasts
Source: PubMed Central journal article supplement (PMC4700155; doi:10.1155/2015/714230), 2015-12-22
Supplement: 714230.f1.pdf [file 714230.f1.pdf]

# Supplemental Table

## 1 *Sequences used for PCR*

| Gene               | Forward 5' – 3'                            | Reverse 3' – 5'                            | Probe                                         | Applied Biosystem<br>reference number |
|--------------------|--------------------------------------------|--------------------------------------------|-----------------------------------------------|---------------------------------------|
| <b>RPFL0</b>       | 5'-TGG GCA<br>AGA ACA CCA<br>TGA TG-3'     | 5'-CGG ATA TGA<br>GGC AGC AGT<br>TTC-3'    | 5'-AGG GCA CCT<br>GGA AAA CAA<br>CCC AGC-3'   |                                       |
| <b>Runx2</b>       | 5'-AGC AAG GTT<br>CAA CGA TCT<br>GAG AT-3' | 5'-TTT GTG AAG<br>ACG GTT ATG<br>GTC AA-3' | 5'-TGA AAC TCT<br>TGC CTC GTC<br>CAC TCC G-3' |                                       |
| <b>Sox9</b>        |                                            |                                            |                                               | Hs00165814_m1                         |
| <b>OC</b>          | 5'-AAG AGA<br>CCC AGG CGC<br>TAC CT-3'     | 5'-AAC TCG TCA<br>CAG TCC GGA<br>TTG-3'    | 5'- ATG GCT<br>GGG AGC CCC<br>AGT CCC-3'      |                                       |
| <b>ALPL</b>        |                                            |                                            |                                               | Hs00758162_m1                         |
| <b>Col<br/>1A1</b> | 5'-CCC TGG AAA<br>GAA TGG AGA<br>TGA T-3'  | 5'-ACT GAA ACC<br>TCT GTG TCC<br>CTT CA-3' | 5'-CGG GCA ATC<br>CTC GAG CAC<br>CCT-3'       |                                       |
